# Supplementary material for: A hemicellulose and lignin-first process for corn stover valorization catalyzed by aluminum sulfate in γ-butyrolactone/water co-solvent
Source: Royal Society of Chemistry journal article supplement (doi:10.1039/d2gc01692c), 2022-01-01
Supplement: d2gc01692c1.pdf [file d2gc01692c1.pdf]

ARTICLE

***Supplementary information***

Received 00th January 20xx,  
Accepted 00th January 20xx

DOI: 10.1039/x0xx00000x

**A hemicellulose and lignin-first process for corn stover valorization catalyzed by aluminum sulfate in  $\gamma$ -butyrolactone/water co-solvent**

Yiping Luo<sup>a</sup>, Min Wei<sup>a</sup>, Bin Jiang<sup>a</sup>, Mingyi Zhang<sup>a</sup>, Qian Miao<sup>a</sup>, Hongquan Fu<sup>c\*</sup>, James H. Clark<sup>b</sup> and Jiajun Fan<sup>b\*</sup>

<sup>a</sup> College of Materials and Chemistry & Chemical Engineering, Chengdu University of Technology, Chengdu, Sichuan 610059, PR China.

<sup>b</sup> Green Chemistry Centre of Excellence, Department of Chemistry, University of York, York, YO10 5DD, UK. Email: [alice.fan@york.ac.uk](mailto:alice.fan@york.ac.uk)

<sup>c</sup> College of Chemistry and Chemical Engineering, Chemical Synthesis and Pollution Control Key Laboratory of Sichuan Province, China West Normal University, Nanchong, Sichuan 637000, China. Email: [fubestone@163.com](mailto:fubestone@163.com)

### I. The organosolv fractionation of raw biomass

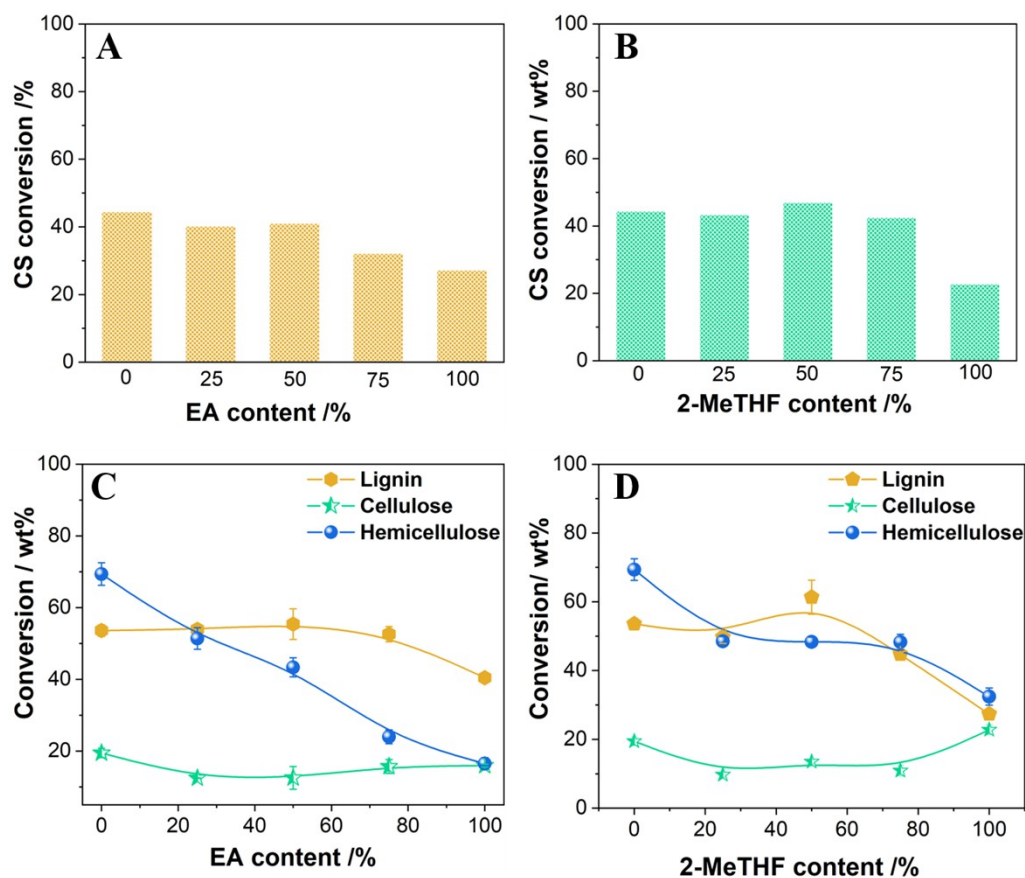

**Figure S1** The transformation of corn stover and the three main components in corn stover at 160 °C for 2 h under EA/H<sub>2</sub>O and 2-MeTHF/H<sub>2</sub>O systems (Reaction condition: 3 g corn stover, 60 mL co-solvent with different organic solvent contents (0, 25, 50, 75 and 100%), 160 °C, 2 h)

## II. Optimization of reaction conditions for corn stover fractionation

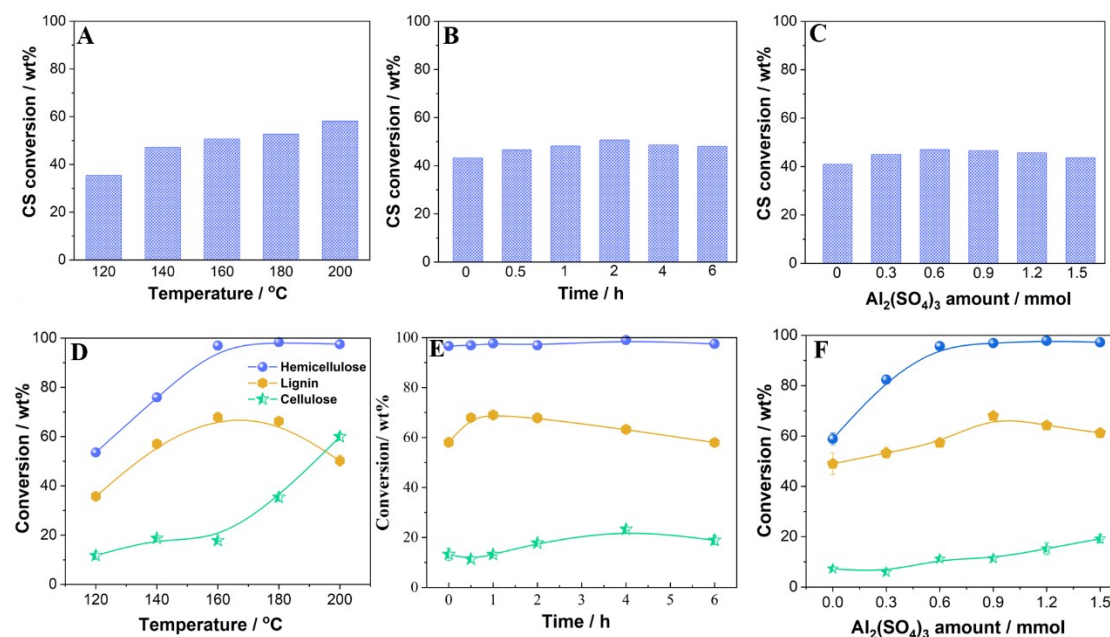

**Figure S2** Effects of temperature (A and D), time (B and E) and  $\text{Al}_2(\text{SO}_4)_3$  amounts (C and F) in 25% GBL/ $\text{H}_2\text{O}$ - $\text{Al}_2(\text{SO}_4)_3$  on the transformation of corn stover and the three main components in corn stover (A and D, 3 g corn stover, 60 mL 25% GBL/ $\text{H}_2\text{O}$ , 0.9 mmol  $\text{Al}_2(\text{SO}_4)_3$ , 120-200 °C for 2 h; B and E, 3 g corn stover, 60 mL 25% GBL/ $\text{H}_2\text{O}$ , 0.9 mmol  $\text{Al}_2(\text{SO}_4)_3$ , 160 °C for 0-6 h; C and F, 3 g corn stover, 60 mL 25% GBL/ $\text{H}_2\text{O}$ , 160 °C for 0.5 h; 0-1.5 mmol  $\text{Al}_2(\text{SO}_4)_3$ )

### III. Ion strength of different solutions

**Table S1** Ion strength of different solutions without considering salt hydrolysis

| Sulfate salt solution                           | Ion strength (I)/<br>(mol/kg) <sup>a</sup> | Chloride salt solution | Ion strength (I)/<br>(mol/kg) <sup>a</sup> |
|-------------------------------------------------|--------------------------------------------|------------------------|--------------------------------------------|
| H <sub>2</sub> SO <sub>4</sub> <sup>b</sup>     | 0.06                                       | HCl                    | 0.09                                       |
| Al <sub>2</sub> (SO <sub>4</sub> ) <sub>3</sub> | 0.31                                       | AlCl <sub>3</sub>      | 0.25                                       |
| Fe <sub>2</sub> (SO <sub>4</sub> ) <sub>3</sub> | 0.31                                       | FeCl <sub>3</sub>      | 0.25                                       |
| K <sub>2</sub> SO <sub>4</sub>                  | 0.19                                       | KCl                    | 0.12                                       |
| Na <sub>2</sub> SO <sub>4</sub>                 | 0.19                                       | NaCl                   | 0.12                                       |
| CaSO <sub>4</sub>                               | 0.25                                       | CaCl <sub>2</sub>      | 0.19                                       |

<sup>a</sup> Ion strength of different solutions was calculated using the equation ( $I=1/2\sum b(B)*z(B)^2$ ,  $b(B)$  is the molar concentration (mol/kg) of B ion,  $Z(B)$  is ion valence of B); <sup>b</sup> Ion strength of H<sub>2</sub>SO<sub>4</sub> which considered the secondary ionization is incomplete in Figure S3.

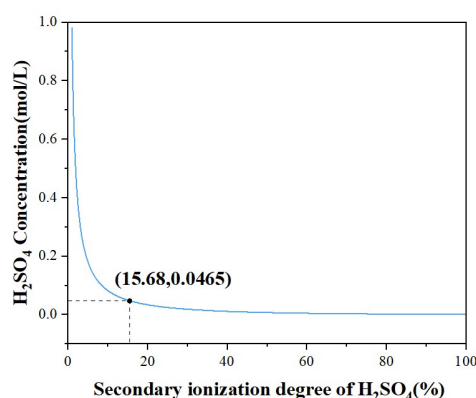

**Figure S3** The relationship between H<sub>2</sub>SO<sub>4</sub> concentration and its secondary ionization degree

H<sub>2</sub>SO<sub>4</sub> is a binary strong acid with a two-stage ionization characteristic. As shown in Figure S3, the first ionization can be complete to produce H<sup>+</sup> and HSO<sub>4</sub><sup>-</sup>, while the degree of secondary ionization is related to the concentration of H<sub>2</sub>SO<sub>4</sub>. The concentration of H<sub>2</sub>SO<sub>4</sub> used in this work was 0.0465 mol/L, and the secondary ionization degree was 15.68%, indicating that the secondary ionization was incomplete.

#### IV. pH values of different salt solutions

**Table S2** pH values of different solvent systems before and after reaction

| Solvent systems                                                          | Initial pH | Final pH |
|--------------------------------------------------------------------------|------------|----------|
| 25% GBL/H <sub>2</sub> O                                                 | 5.43       | 3.70     |
| 25% GBL/H <sub>2</sub> O-H <sub>2</sub> SO <sub>4</sub>                  | 1.45       | 1.63     |
| 25% GBL/H <sub>2</sub> O-Al <sub>2</sub> (SO <sub>4</sub> ) <sub>3</sub> | 2.97       | 1.99     |
| 25% GBL/H <sub>2</sub> O-Fe <sub>2</sub> (SO <sub>4</sub> ) <sub>3</sub> | 2.14       | 2.97     |
| 25% GBL/H <sub>2</sub> O-K <sub>2</sub> SO <sub>4</sub>                  | 5.21       | 3.72     |
| 25% GBL/H <sub>2</sub> O-Na <sub>2</sub> SO <sub>4</sub>                 | 5.06       | 3.70     |
| 25% GBL/H <sub>2</sub> O-Ca <sub>2</sub> SO <sub>4</sub>                 | 4.93       | 3.60     |
| 25% GBL/H <sub>2</sub> O-HCl                                             | 1.12       | 1.42     |
| 25% GBL/H <sub>2</sub> O-AlCl <sub>3</sub>                               | 2.86       | 2.28     |
| 25% GBL/H <sub>2</sub> O-FeCl <sub>3</sub>                               | 1.84       | 2.70     |
| 25% GBL/H <sub>2</sub> O-KCl                                             | 4.44       | 3.61     |
| 25% GBL/H <sub>2</sub> O-NaCl                                            | 4.42       | 3.52     |
| 25% GBL/H <sub>2</sub> O-CaCl <sub>2</sub>                               | 4.91       | 3.43     |

Reaction condition: 3 g corn stover, 60 mL 25% GBL/H<sub>2</sub>O, sulfate salts with 2.8 mmol SO<sub>4</sub><sup>2-</sup> or chloride salts with 5.6 mmol Cl<sup>-</sup> or mineral acids (2.8 mmol H<sub>2</sub>SO<sub>4</sub> and 5.6 mmol HCl), 160 °C for 2 h. pH values were measured after the complete dissolution of metal salts in water at room temperature (initial pH), and after reaction (final pH).

## V. Quantum Chemical Calculation

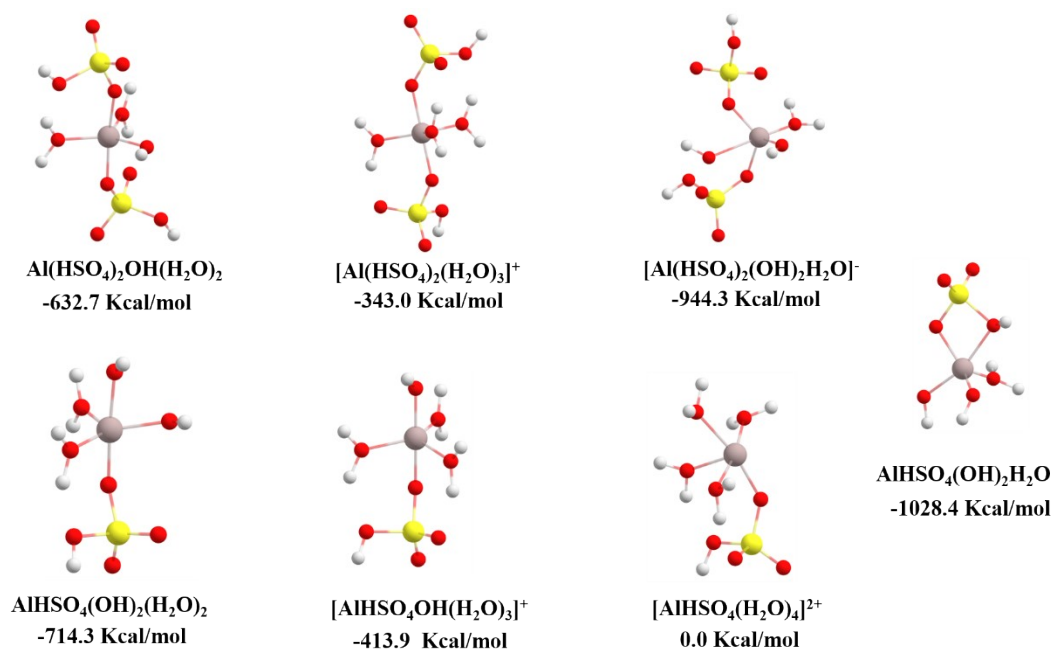

**Figure S4** Geometric structures and the relative Gibbs free energy ( $\Delta G$ , Kcal/mol) of possible  $[\text{Al}(\text{HSO}_4)_p(\text{OH})_m(\text{H}_2\text{O})_n]^{3-m-p}$  species

## VI. The yield of small molecular products mainly from hemicellulose

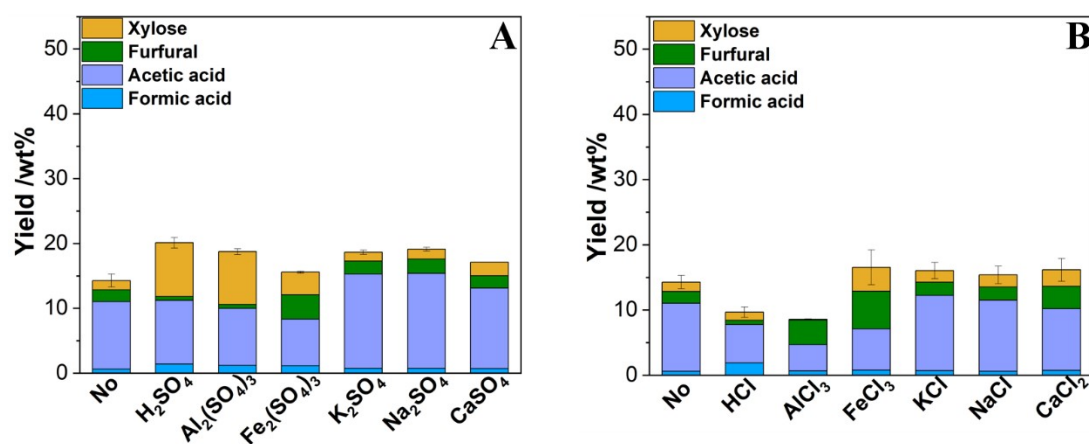

**Figure S5** Effects of sulfate salts, chloride salts and mineral acids (H<sub>2</sub>SO<sub>4</sub> and HCl) in 25% GBL/H<sub>2</sub>O co-solvent on the yield of small molecular products mainly from hemicellulose in corn stover at 160 °C for 2 h (Reaction condition: 3 g corn stover, 60 mL 25% GBL/H<sub>2</sub>O, 160 °C for 2 h, sulfate salts with 2.8 mmol SO<sub>4</sub><sup>2-</sup> or chloride salts with 5.6 mmol Cl<sup>-</sup> or mineral acids (2.8 mmol H<sub>2</sub>SO<sub>4</sub> and 5.6 mmol HCl), the yield of small molecular products was based on the weight of corn stover)

## VII. GC-FID analysis of monophenol yield from lignin

**Table S3** The yield of monophenols obtained from different systems

| Products                                 | Yield/% (based on the weight of lignin) |                    |                    |                    |                      |                                                                  |                                                                    |
|------------------------------------------|-----------------------------------------|--------------------|--------------------|--------------------|----------------------|------------------------------------------------------------------|--------------------------------------------------------------------|
|                                          | H <sub>2</sub> O <sup>a</sup>           | 25GBL <sup>a</sup> | 50GBL <sup>a</sup> | 75GBL <sup>a</sup> | 100 GBL <sup>a</sup> | Al <sub>2</sub> (SO <sub>4</sub> ) <sub>3</sub> -2h <sup>b</sup> | Al <sub>2</sub> (SO <sub>4</sub> ) <sub>3</sub> -0.5h <sup>c</sup> |
| Phenol                                   | 0.000                                   | 0.026              | 0.058              | 0.103              | 0.172                | 0.075                                                            | 0.045                                                              |
| O-cresol                                 | 0.051                                   | 1.375              | 11.969             | 5.251              | 1.009                | 0.029                                                            | 0.000                                                              |
| 2,3-dihydrobenzofuran                    | 0.000                                   | 0.020              | 0.000              | 0.000              | 0.000                | 0.068                                                            | 0.304                                                              |
| P-cresol                                 | 0.003                                   | 0.000              | 0.000              | 0.000              | 0.033                | 0.047                                                            | 0.039                                                              |
| Guaiacol                                 | 0.000                                   | 0.117              | 0.274              | 0.392              | 0.963                | 0.046                                                            | 0.042                                                              |
| 4-ethylphenol                            | 0.000                                   | 0.010              | 0.000              | 0.039              | 0.047                | 0.011                                                            | 0.361                                                              |
| 4-methyl guaiacol                        | 0.000                                   | 0.038              | 0.046              | 0.050              | 0.217                | 0.049                                                            | 0.269                                                              |
| 4-vinylphenol                            | 0.455                                   | 1.127              | 2.388              | 1.461              | 1.915                | 1.684                                                            | 3.287                                                              |
| 4-propyl phenol                          | 0.007                                   | 0.009              | 0.133              | 0.160              | 0.351                | 0.385                                                            | 1.770                                                              |
| 4-ethyl guaiacol                         | 0.000                                   | 0.028              | 0.079              | 0.000              | 0.083                | 0.187                                                            | 0.418                                                              |
| 4-vinyl guaiacol                         | 0.574                                   | 1.184              | 1.994              | 0.884              | 0.690                | 2.055                                                            | 4.317                                                              |
| Syringol                                 | 0.000                                   | 0.035              | 0.000              | 0.043              | 0.127                | 0.032                                                            | 0.022                                                              |
| Eugenol                                  | 0.001                                   | 0.021              | 0.069              | 0.000              | 0.000                | 0.095                                                            | 0.062                                                              |
| 3-(4-Hydroxy-3-methoxyphenyl)-1-propanol | 0.001                                   | 0.000              | 0.066              | 0.000              | 0.000                | 0.040                                                            | 0.049                                                              |
| Syringaldehyde                           | 0.014                                   | 0.000              | 0.000              | 0.000              | 0.000                | 0.135                                                            | 0.187                                                              |
| 4-(3-Hydroxypropyl)-2,6-dimethoxyphenol  | 0.010                                   | 0.000              | 0.000              | 0.000              | 0.000                | 0.000                                                            | 0.033                                                              |
| Total yield                              | 1.115                                   | 3.989              | 17.077             | 8.384              | 5.607                | 4.937                                                            | 11.204                                                             |

<sup>a</sup> GBL/H<sub>2</sub>O co-solvent with different contents of GBL<sup>b</sup> 25%GBL/H<sub>2</sub>O with 0.9 mmol Al<sub>2</sub>(SO<sub>4</sub>)<sub>3</sub> at 160 °C for 2 h<sup>c</sup> 25%GBL/H<sub>2</sub>O with 0.9 mmol Al<sub>2</sub>(SO<sub>4</sub>)<sub>3</sub> at 160 °C for 0.5 h



## VIII. GC-FID spectra

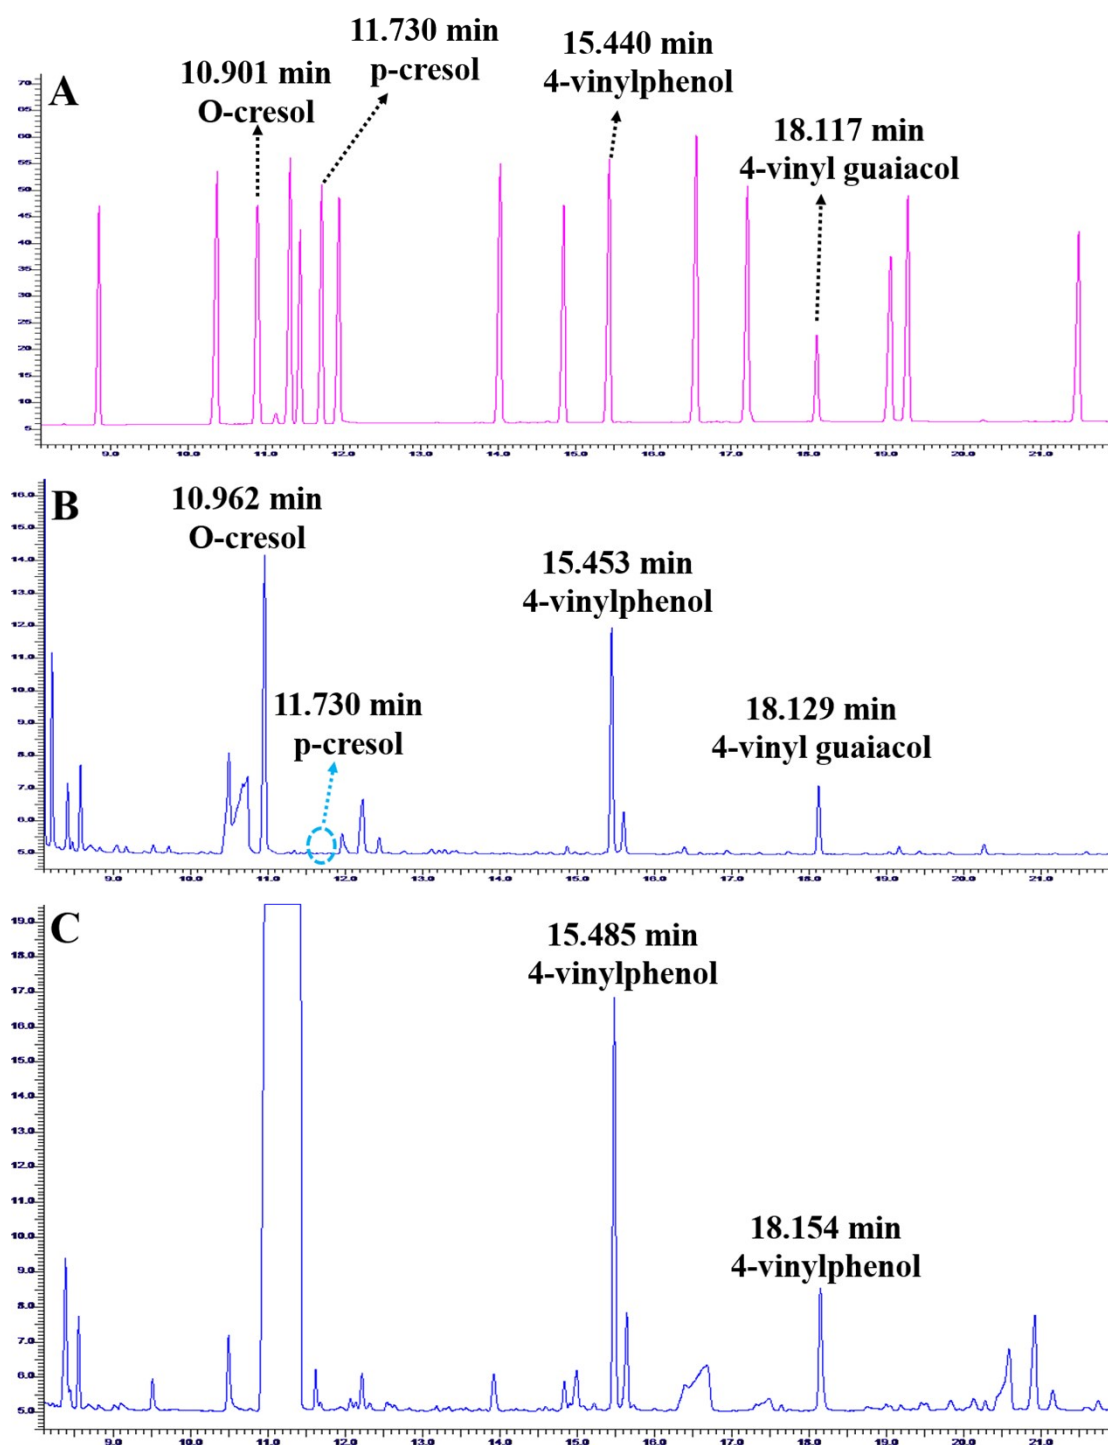

**Figure S6** GC-FID spectra of monophenol mixture standards (A), liquid fraction obtained from 25% GBL/H<sub>2</sub>O (B) and 25% GBL/H<sub>2</sub>O-Al<sub>2</sub>(SO<sub>4</sub>)<sub>3</sub> (C) system

## IX. 2D HSQC NMR analysis

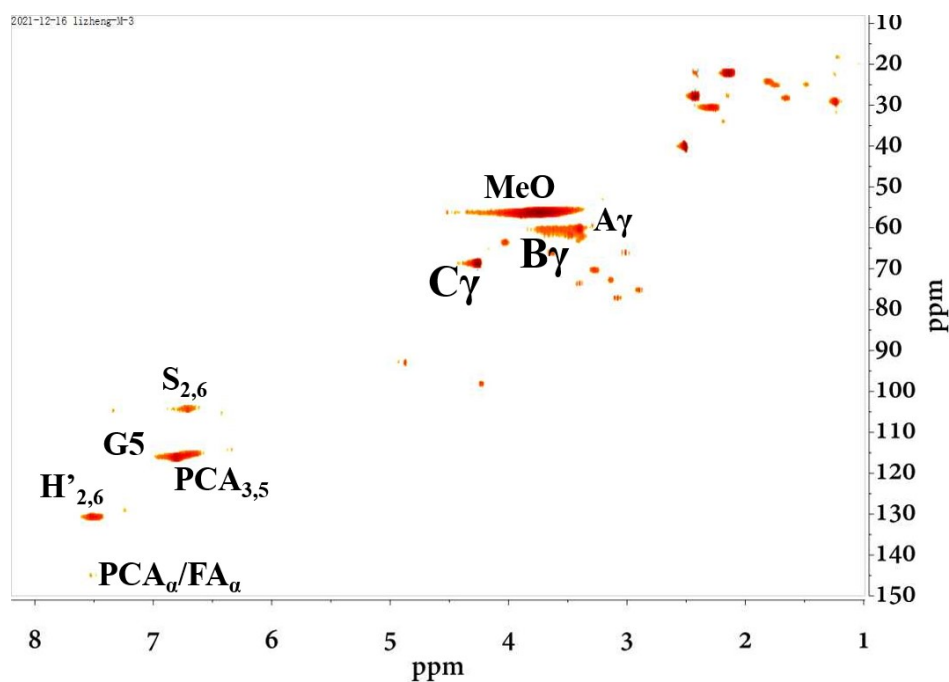

**Figure S7** 2D HSQC NMR results of liquid fraction obtained from 25% GBL/H<sub>2</sub>O-Al<sub>2</sub>(SO<sub>4</sub>)<sub>3</sub> system at 160 °C for 0.5 h

**Table S4** Assignment of main lignin <sup>13</sup>C-<sup>1</sup>H correlation signals in 2D HSQC NMR spectra [1-2]

| Lables                            | $\delta_C / \delta_H$ | Assignment                                                                                       |
|-----------------------------------|-----------------------|--------------------------------------------------------------------------------------------------|
| A <sub>γ</sub>                    | 59.8/3.61             | C <sub>γ</sub> -H <sub>γ</sub> in β-O-4' structure(A)                                            |
| A' <sub>γ</sub>                   | 63.0/4.36             | C <sub>γ</sub> -H <sub>γ</sub> in γ-acylated β-O-4 (A')                                          |
| B <sub>γ</sub>                    | 62.2/3.76             | C <sub>γ</sub> -H <sub>γ</sub> in phenylcoumaran (B)                                             |
| C <sub>γ</sub>                    | 71.2/3.82-4.18        | C <sub>γ</sub> -H <sub>γ</sub> in β-β' resinol (C)                                               |
| H' <sub>2,6</sub>                 | 130.8/7.56            | C <sub>2,6</sub> -H <sub>2,6</sub> in oxidized(C=O) p-hydroxyphenyl units(H')                    |
| H <sub>2,6</sub>                  | 128.2/7.19            | C <sub>2,6</sub> -H <sub>2,6</sub> in p-hydroxyphenyl units(H)                                   |
| G <sub>5</sub>                    | 115.3/6.80            | C <sub>5</sub> -H <sub>5</sub> in guaiacyl units(G)                                              |
| MeO                               | 56.0/3.71             | C-H in methoxyls                                                                                 |
| PCA <sub>3,5</sub>                | 115.5/6.77            | C <sub>3</sub> -H <sub>3</sub> and C <sub>5</sub> -H <sub>5</sub> in p-coumarate structure (PCA) |
| PCA <sub>α</sub> /FA <sub>α</sub> | 144.4/7.51            | C <sub>α</sub> -H <sub>α</sub> in p-coumarate structure (PCA) and ferulate (FA)                  |
| S <sub>2,6</sub>                  | 104.4/6.72            | C <sub>2,6</sub> -H <sub>2,6</sub> in syringyl units(S)                                          |

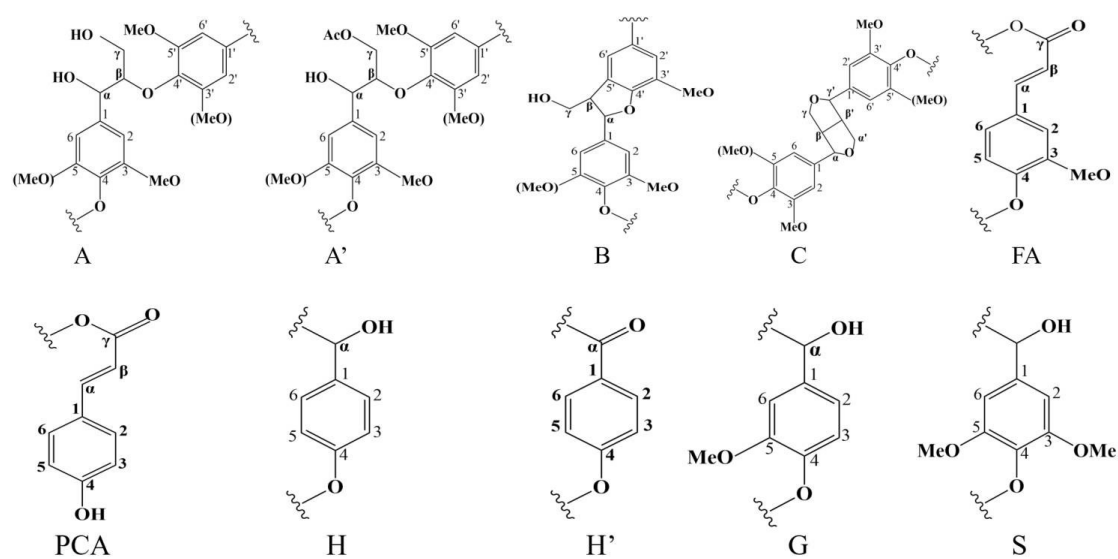

**Figure S8** Main structures present in 2D HSQC NMR spectra assignment of Table S4

## X. ESI-MS results

The lignin-derived oligomers according to the molecular weights described in Figure 4 (C-F) were listed below:

$$m/z(166.09)=m(148.05)+\text{NH}_4^+$$

$$m/z(182.06)=m(164.05)+\text{NH}_4^+$$

$$m/z(217.11)=m(194.06)+\text{Na}^+$$

$$m/z(261.13)=m(260.10)+\text{H}^+$$

$$m/z(283.16)=m(260.10)+\text{Na}^+$$

$$m/z(309.18)=m(290.12)+\text{H}_2\text{O}+\text{H}^+$$

$$m/z(325.15)=m(302.08)+\text{Na}^+$$

$$m/z(347.16)=m(346.16)+\text{H}^+$$

$$m/z(365.16)=m(346.16)+\text{H}_2\text{O}+\text{H}^+$$

$$m/z(437.13)=m(3\text{xylose}-2\text{H}_2\text{O})+\text{Na}^+=m(414.14)+\text{Na}^+$$

$$m/z(453.10)=m(3\text{xylose}-2\text{H}_2\text{O})+\text{K}^+=m(414.14)+\text{K}^+$$

**Table S5** Possible chemical structures of lignin-derived oligomers

| Entry | Molecular weight | Molecular formula                              | Chemical structure                                                                    |
|-------|------------------|------------------------------------------------|---------------------------------------------------------------------------------------|
| 1     | 148.0524         | C <sub>9</sub> H <sub>8</sub> O <sub>2</sub>   | 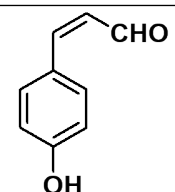   |
| 2     | 164.0473         | C <sub>9</sub> H <sub>8</sub> O <sub>3</sub>   |    |
| 3     | 194.0579         | C <sub>10</sub> H <sub>10</sub> O <sub>4</sub> |     |
| 4     | 260.1049         | C <sub>15</sub> H <sub>16</sub> O <sub>4</sub> |   |
| 5     | 290.1154         | C <sub>16</sub> H <sub>18</sub> O <sub>5</sub> |  |
| 6     | 302.0790         | C <sub>16</sub> H <sub>14</sub> O <sub>6</sub> |  |
| 7     | 346.1569         | C <sub>23</sub> H <sub>22</sub> O <sub>3</sub> |   |

## References

- [1] J. L. Wen, S. L. Sun, B. L. Xue and R. C. Sun, *Materials*, 2013, **6**, 359.
- [2] H. Kim, J. Ralph, *Organic & Biomolecular Chemistry*, 2010, **8**, 576.
